# Supplementary material
Source: PubMed Central journal article supplement (PMC5812888)
Supplement: mmc11.pdf [file mmc11.pdf]

**The American Journal of Human Genetics, Volume 101**

**Supplemental Data**

**Penetrance of Polygenic Obesity Susceptibility Loci  
across the Body Mass Index Distribution**

**Arkan Abadi, Akram Alyass, Sebastien Robiou du Pont, Ben Bolker, Pardeep Singh, Viswanathan Mohan, Rafael Diaz, James C. Engert, Salim Yusuf, Hertzal C. Gerstein, Sonia S. Anand, and David Meyre**
